# Supplementary material for: Linear-type carbazoledioxazine-based organic semiconductors: the effect of backbone planarity on the molecular orientation and charge transport properties
Source: Royal Society of Chemistry journal article supplement (doi:10.1039/c8ra01088a), 2018-01-01
Supplement: c8ra01088a1.pdf [file c8ra01088a1.pdf]

Electronic Supplementary Material (ESI)

## **Electronic Supplementary Information**

### **Linear-type carbazoledioxazine-based organic semiconductors: the effect of backbone planarity on the molecular orientation and charge transport properties**

**Rikuo Otsuka, Yang Wang\*, Takehiko Mori, and Tsuyoshi Michinobu\***

*Department of Materials Science and Engineering, Tokyo Institute of Technology,  
2-12-1 Ookayama, Meguro-ku, Tokyo 152-8552, Japan*

\*Corresponding address:

Yang Wang

Tel/Fax: +81-3-5734-2469, E-mail: wang.y.av@m.titech.ac.jp

Tsuyoshi Michinobu

Tel/Fax: +81-3-5734-3774, E-mail: michinobu.t.aa@m.titech.ac.jp

## **Content**

1. Angular-type and linear-type carbazoledioxazines (CZ)
2. FT-IR spectra
3. GPC curves
4. TGA curves
5. DSC curves
6. Annealing temperature dependence of the mobilities
7. Schematic illustration of the charge transport models
8. 1D profiles of the 2D-GIWAXS patterns
9. NMR spectra

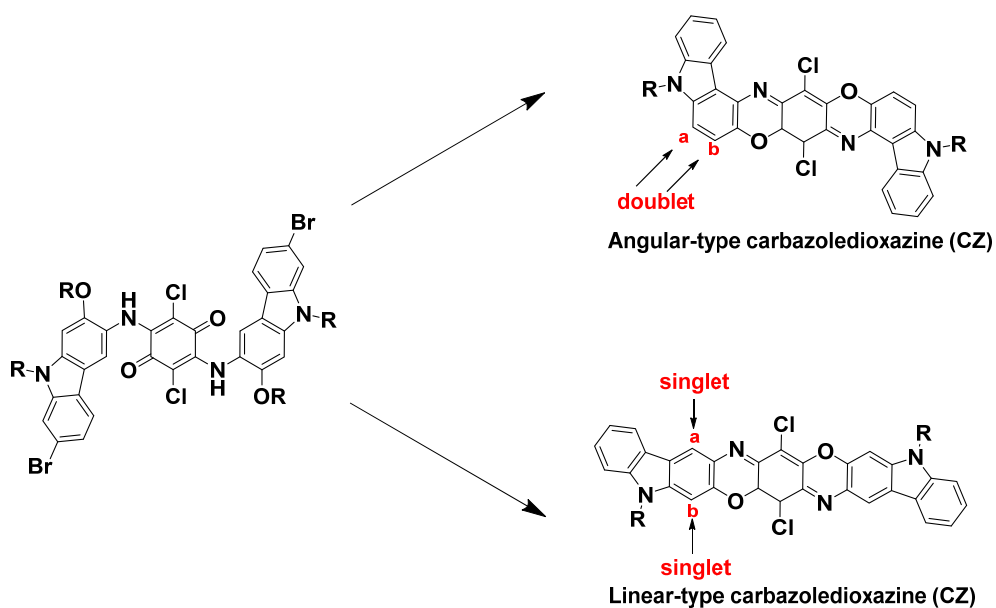

**Fig. S1** The  $^1\text{H}$  NMR resonance multiplicity of angular-type and linear-type carbazodioxazine derivatives.

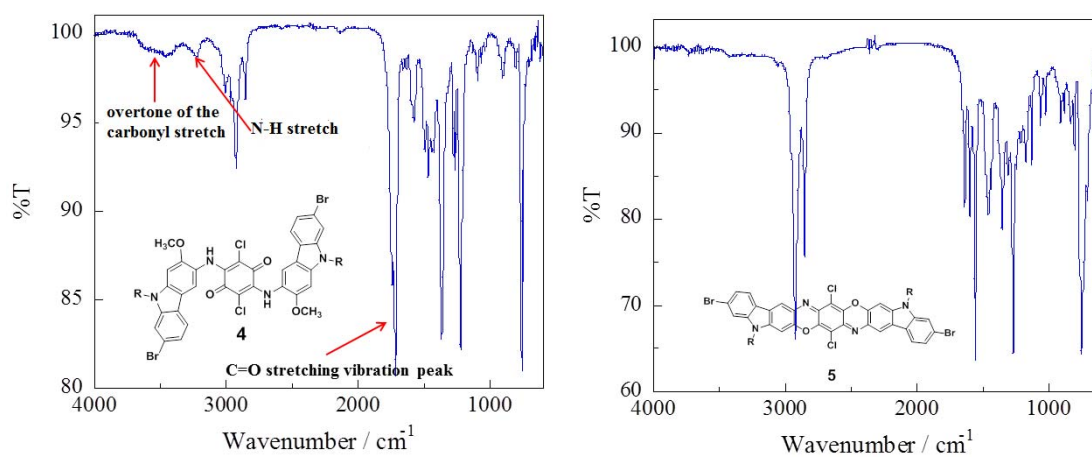

**Fig. S2** FT-IR spectra of **4** (left) and the linear carbazodioxazine monomer **CZ** (right).

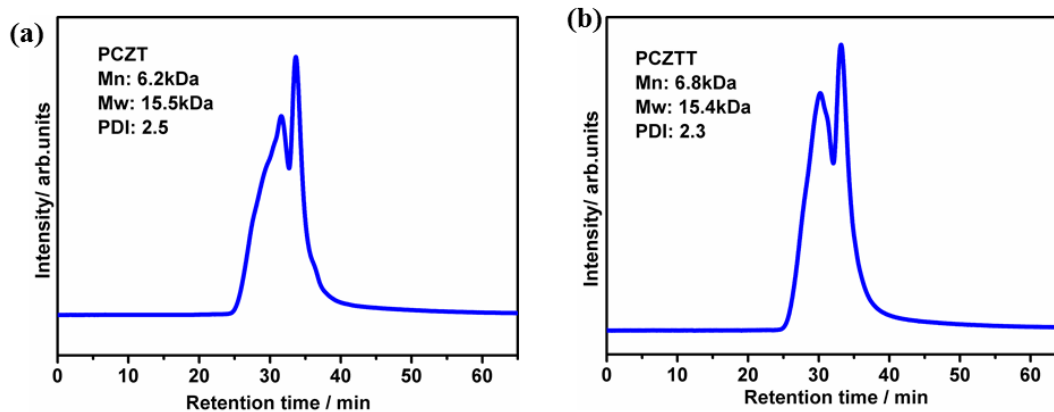

**Fig. S3** GPC curves of (a) PCZT and (b) PCZTT using 1,2-dichlorobenzene as the eluent at 40 °C. Polystyrene standards were used for determining the molecular weights.

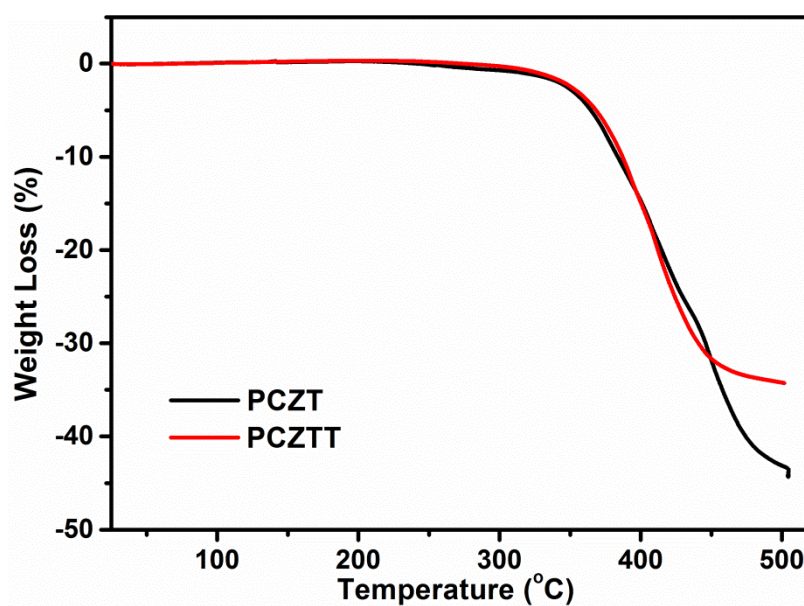

**Fig. S4** Thermogravimetric analysis (TGA) under a nitrogen atmosphere at the heating rate of 10 °C min<sup>-1</sup>.

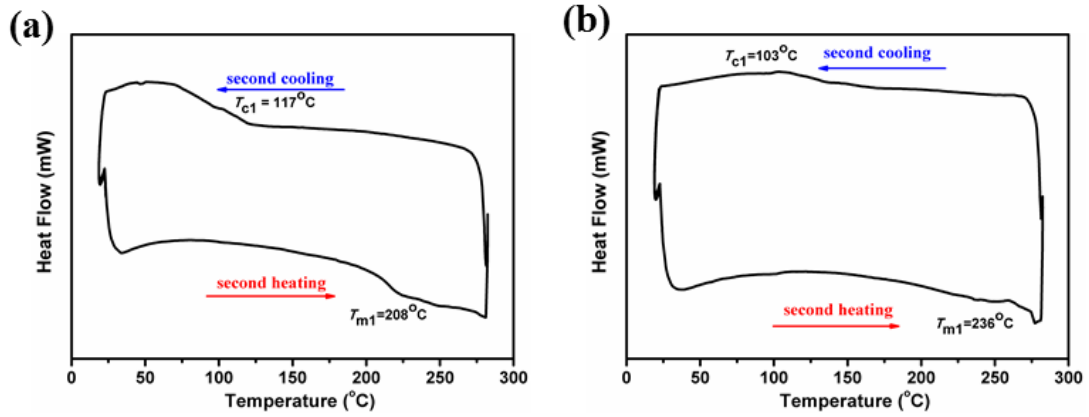

**Fig. S5** Differential scanning calorimetry (DSC) curves of (a) PCZT and (b) PCZTT under a nitrogen atmosphere at the heating or cooling rate of  $10\text{ }^{\circ}\text{C min}^{-1}$ .

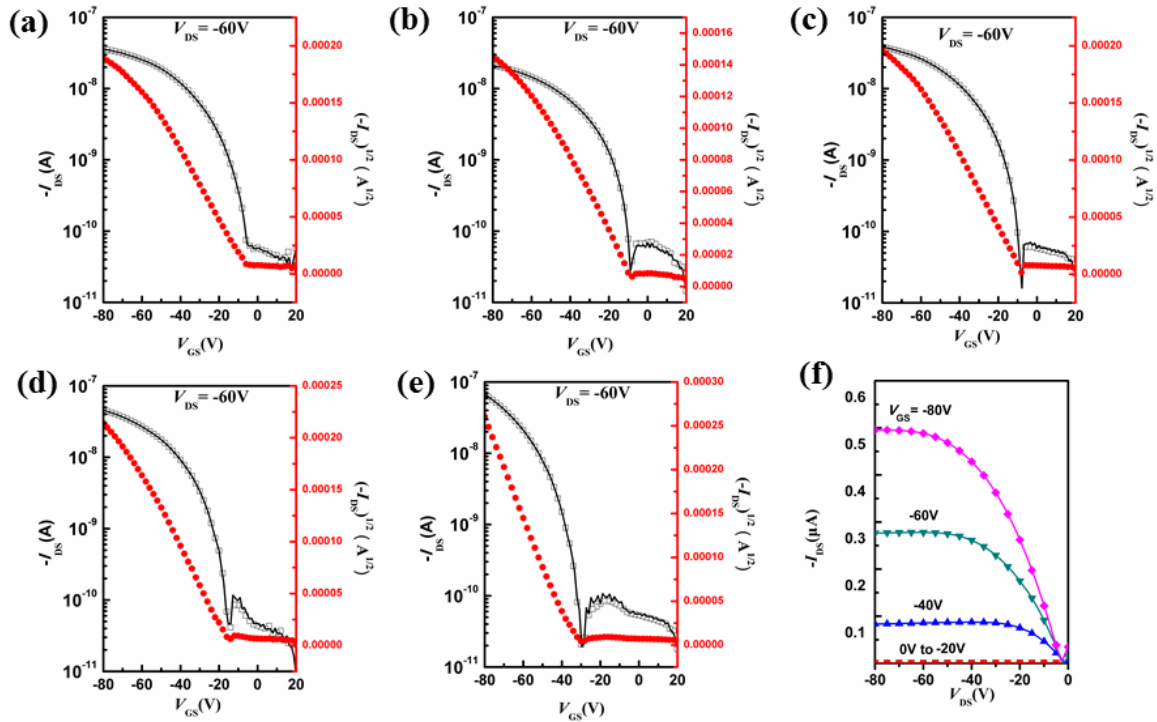

**Fig. S6** Current-voltage (I-V) characteristics of TFTs at different thermal annealing temperatures. Transfer characteristics for PCZT films annealed at (a)  $100\text{ }^{\circ}\text{C}$ , (b)  $150\text{ }^{\circ}\text{C}$ , and (c)  $250\text{ }^{\circ}\text{C}$ . Transfer characteristics for PCZTT films annealed at (d)  $100\text{ }^{\circ}\text{C}$  and (e)  $150\text{ }^{\circ}\text{C}$ . (f) Output characteristics for PCZTT films after annealing at  $250\text{ }^{\circ}\text{C}$  ( $L = 100\text{ }\mu\text{m}$  and  $W = 1\text{ mm}$ ). All the measurements were done in air).

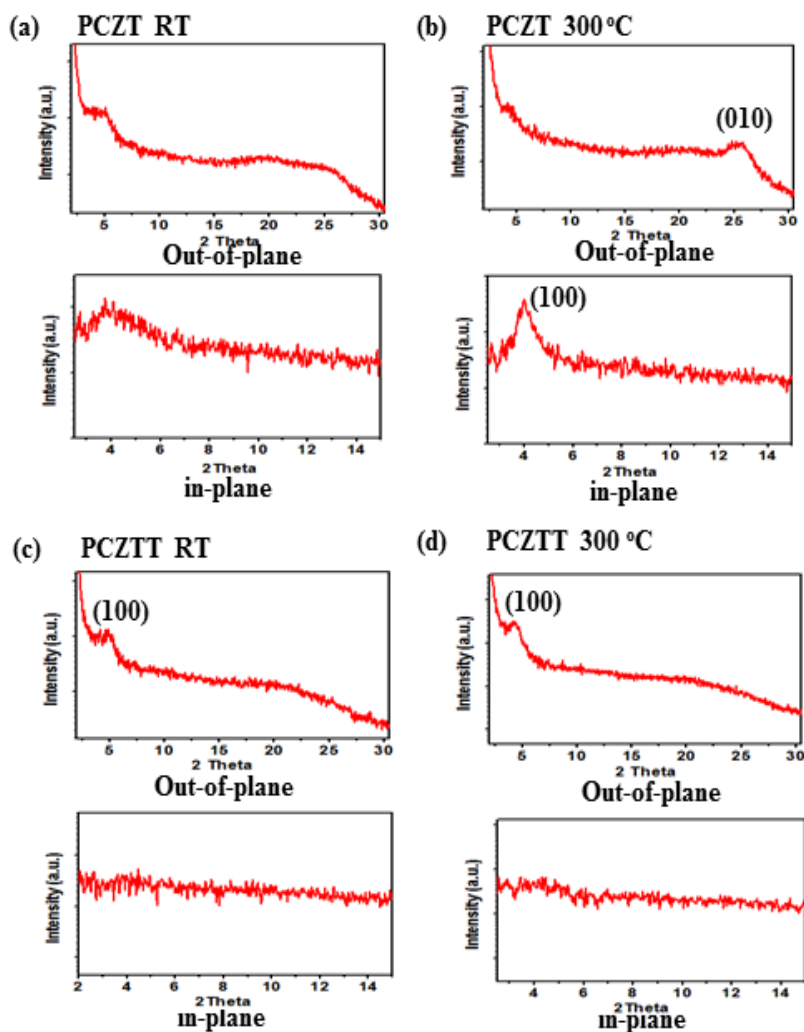

**Fig. S7** The corresponding 1D profiles of the 2D-GIWAXS patterns.

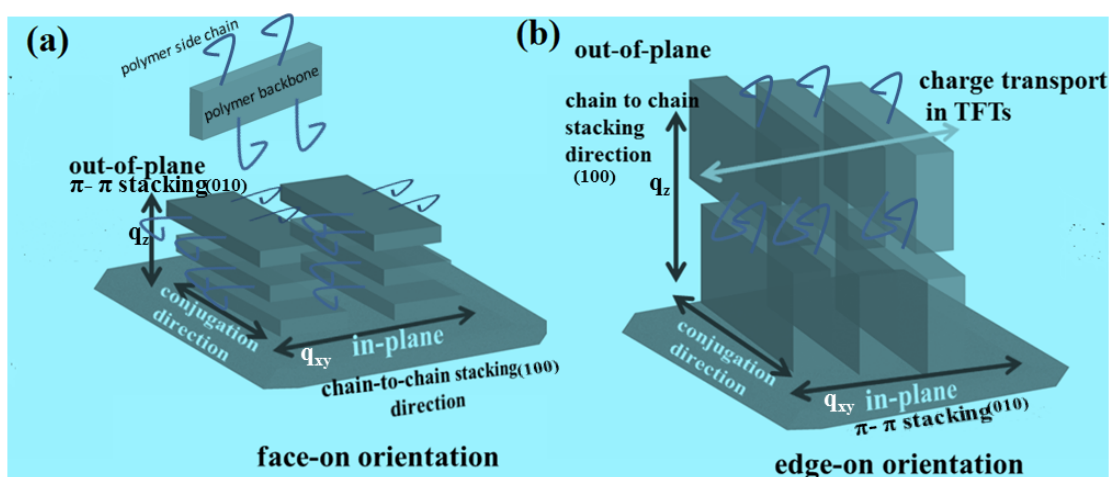

**Fig. S8** Schematic illustration of the charge transport models in lamellar stacking conjugated polymers. (a) Face-on texture of polymeric crystallites; (b) edge-on texture of polymeric crystallites.

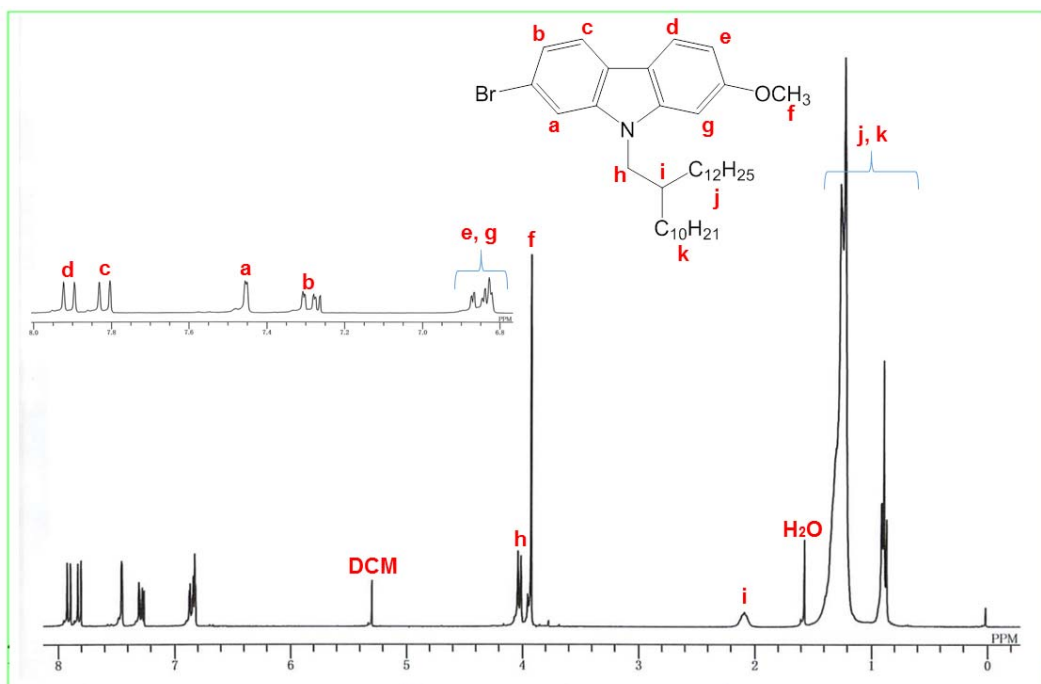

**Fig. S9**  $^1\text{H}$  NMR of compound **2** in  $\text{CDCl}_3$ .

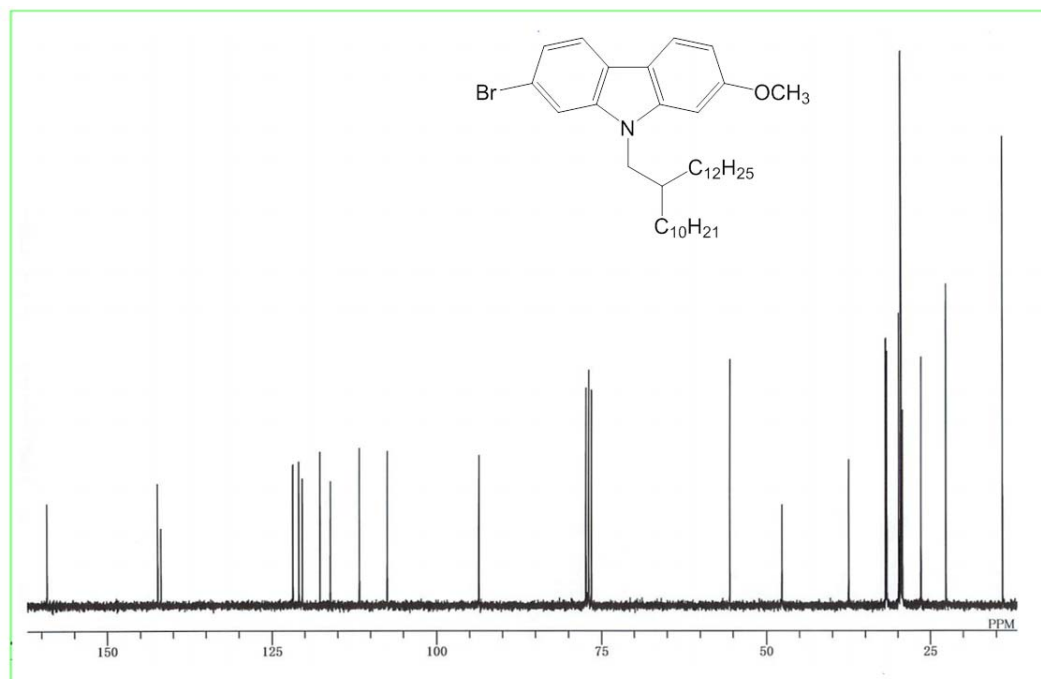

**Fig. S10**  $^{13}\text{C}$  NMR of compound **2** in  $\text{CDCl}_3$ .

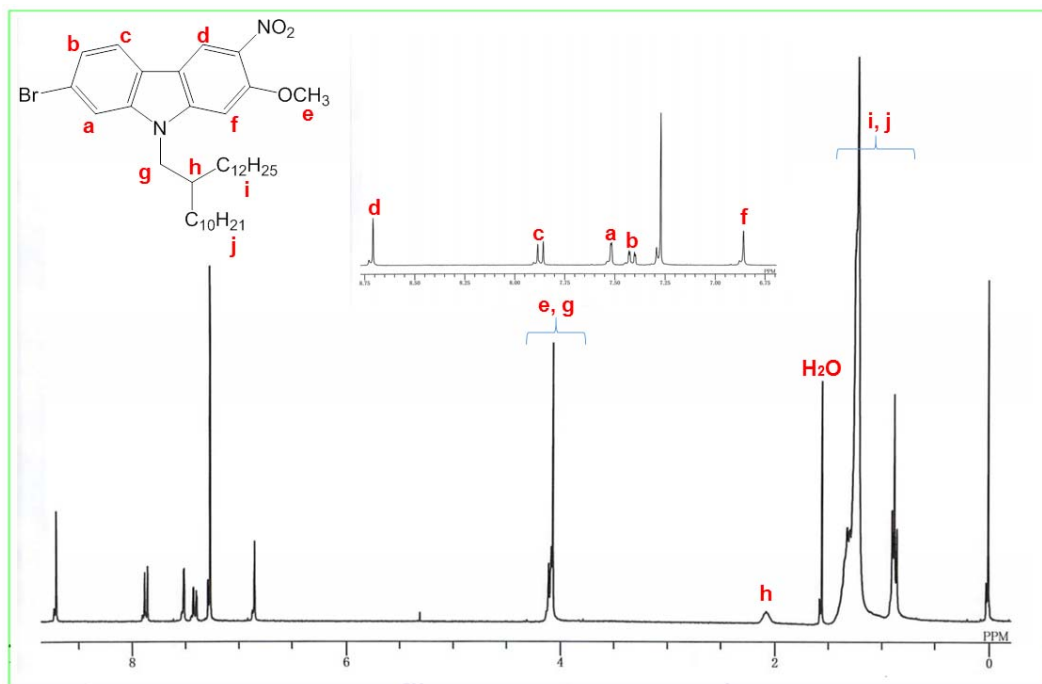

**Fig. S11** <sup>1</sup>H NMR of compound **3** in CDCl<sub>3</sub>.

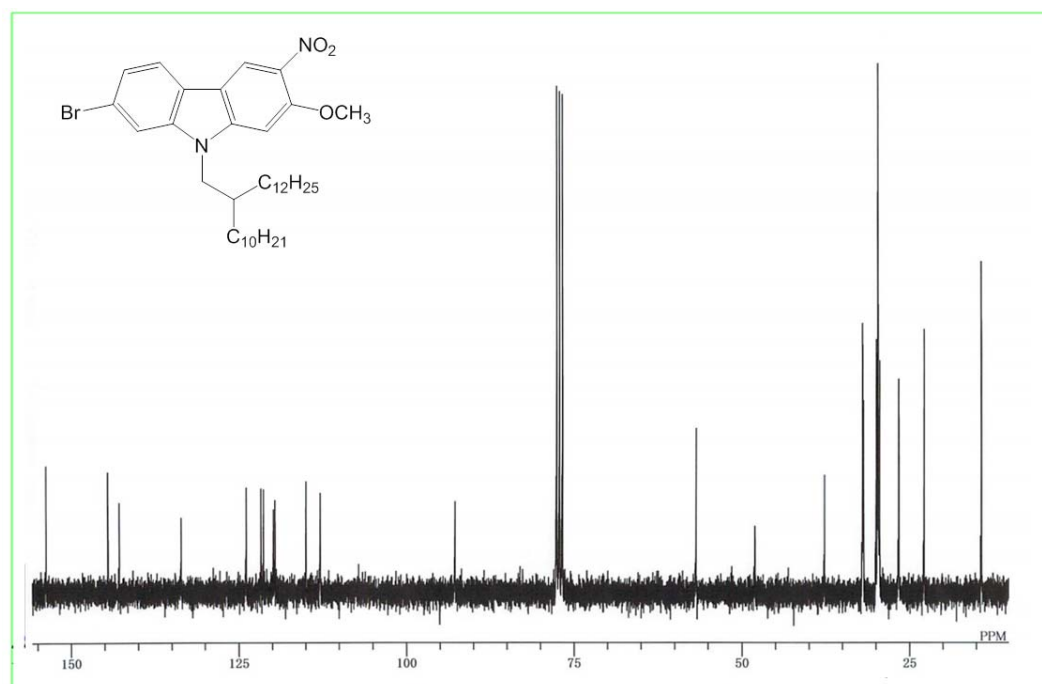

**Fig. S12** <sup>13</sup>C NMR of compound **3** in CDCl<sub>3</sub>.

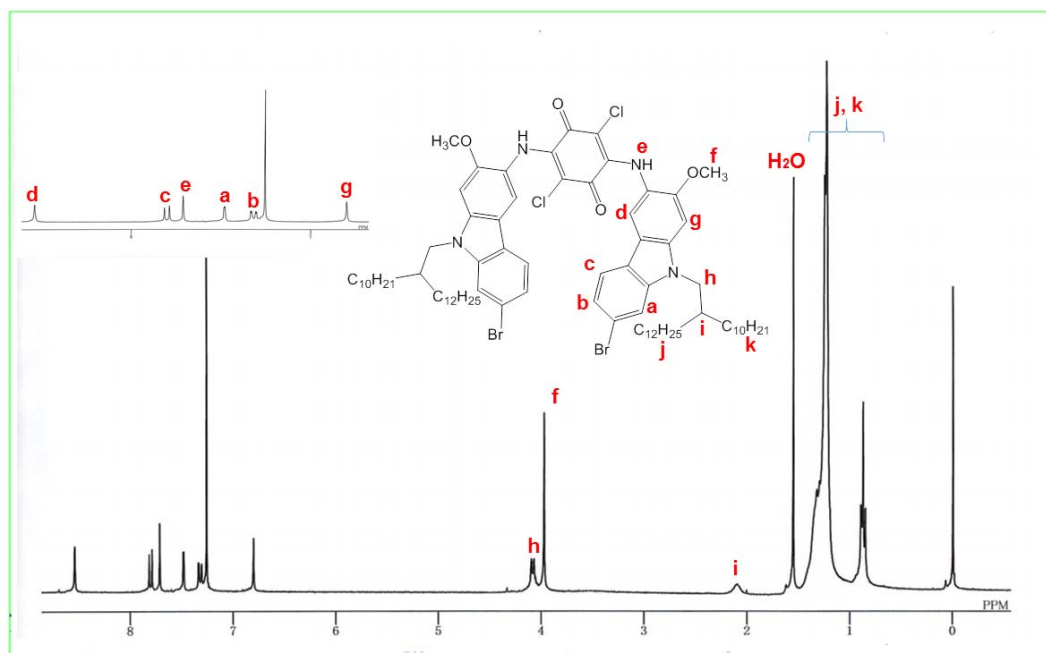

**Fig. S13**  $^1\text{H}$  NMR of compound **4** in  $\text{CDCl}_3$ .

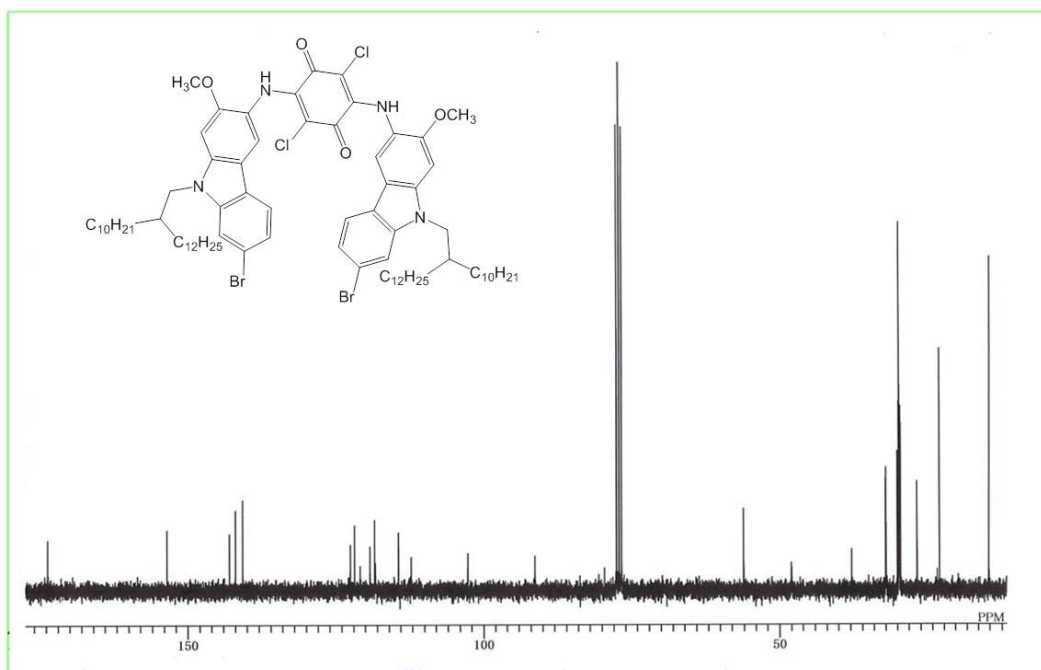

**Fig. S14**  $^{13}\text{C}$  NMR of compound **4** in  $\text{CDCl}_3$ .



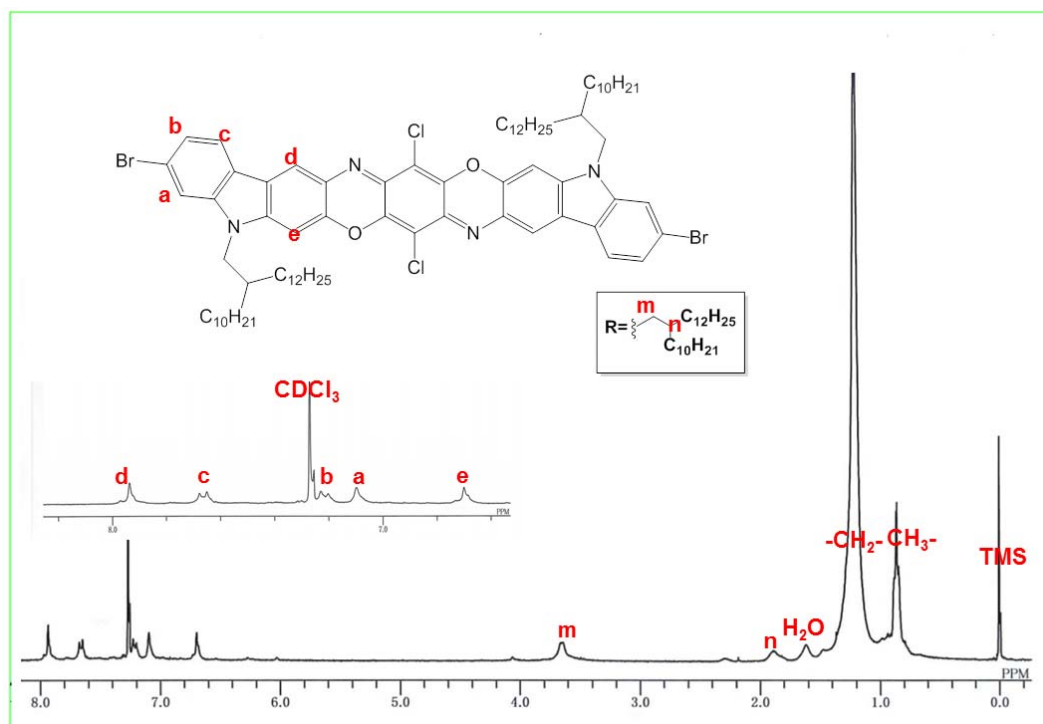

**Fig. S15**  $^1\text{H}$  NMR of compound **CZ** in  $\text{CDCl}_3$ .

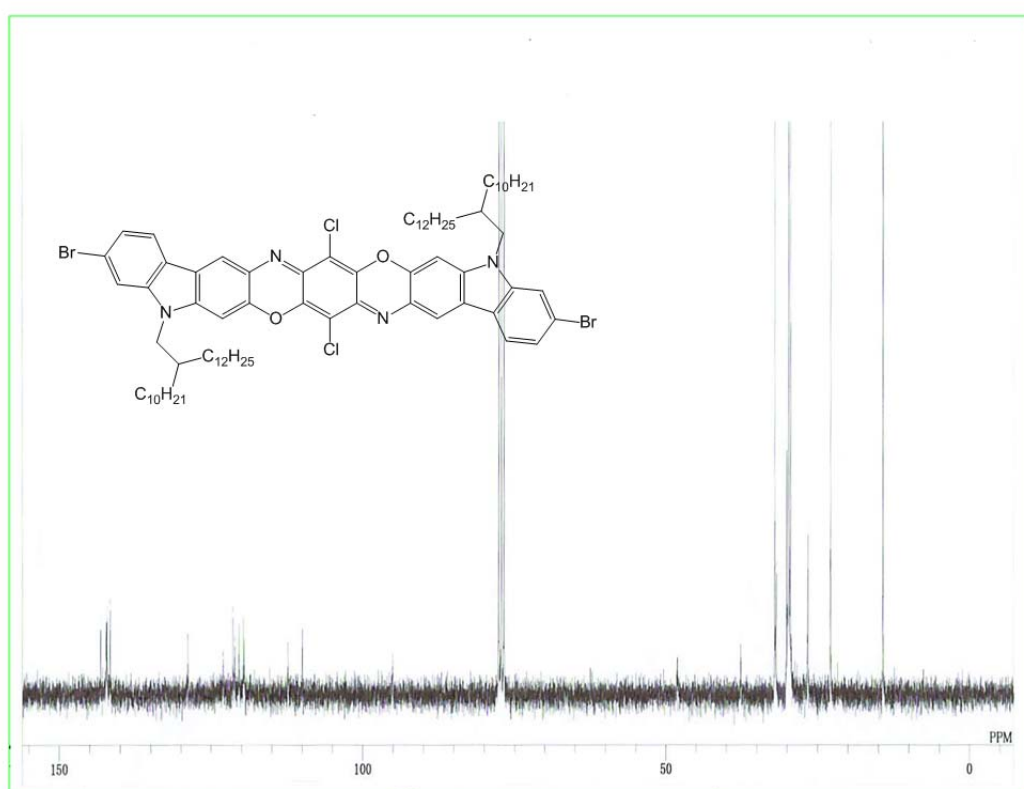

**Fig. S16**  $^{13}\text{C}$  NMR of compound **CZ** in  $\text{CDCl}_3$ .

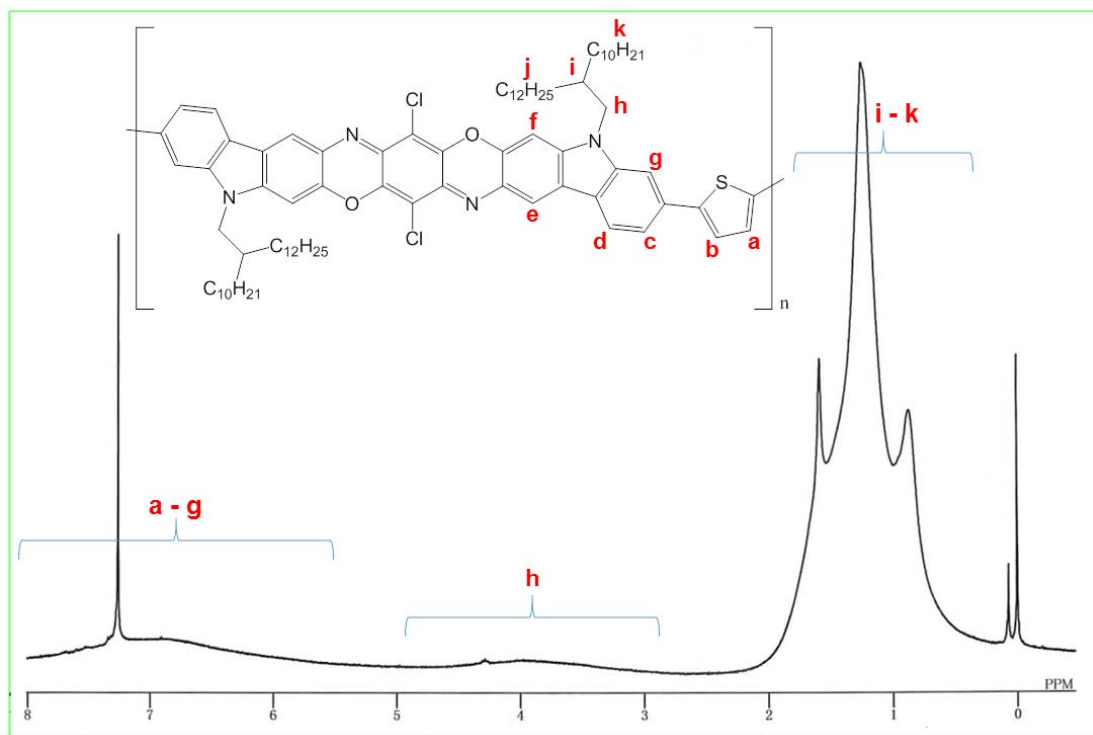

**Fig. S17** <sup>1</sup>H NMR of PCZT in CDCl<sub>3</sub>.

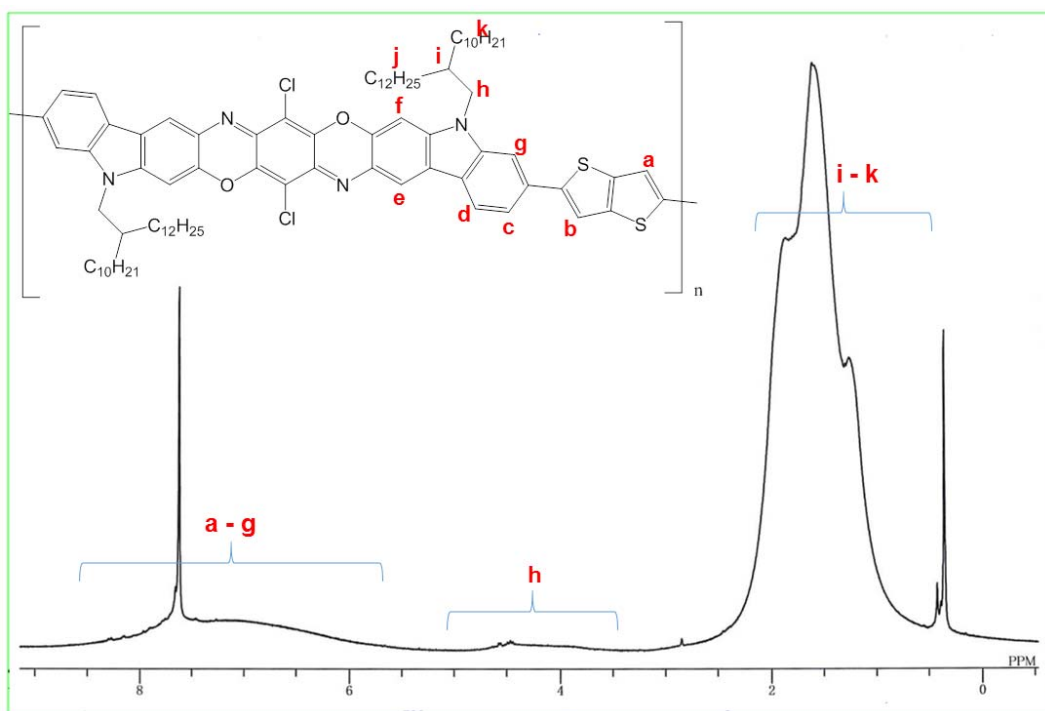

**Fig. S18** <sup>1</sup>H NMR of PCZTT in CDCl<sub>3</sub>.
